# Supplementary figures and images for: Novel canine papillomavirus type 18 found in pigmented plaques
Source: PubMed Central journal article supplement — Papillomavirus Res. 2016 Aug 31;2:159–63. doi: 10.1016/j.pvr.2016.08.001 (PMC5886900; doi:10.1016/j.pvr.2016.08.001), 2016-08-31

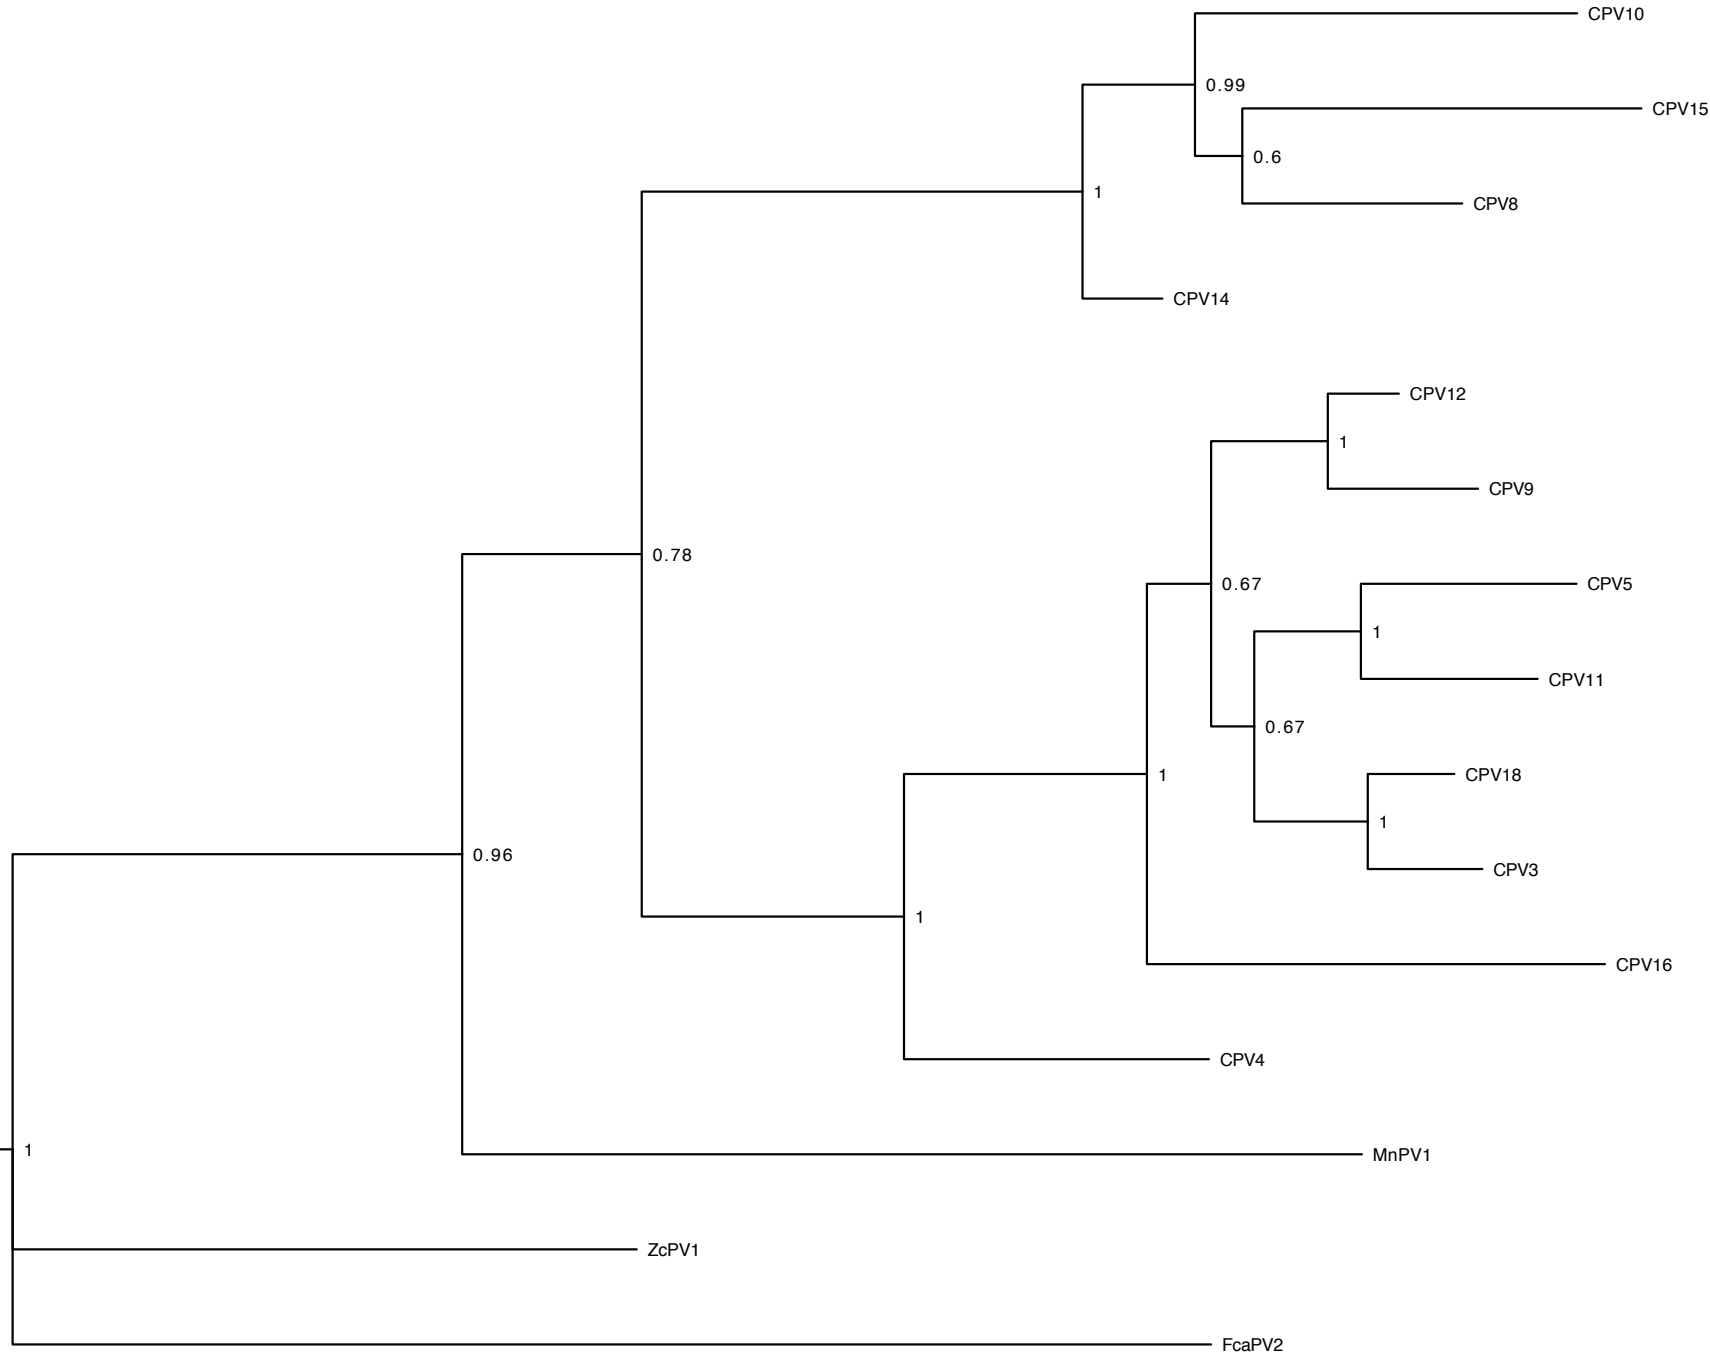

0.2

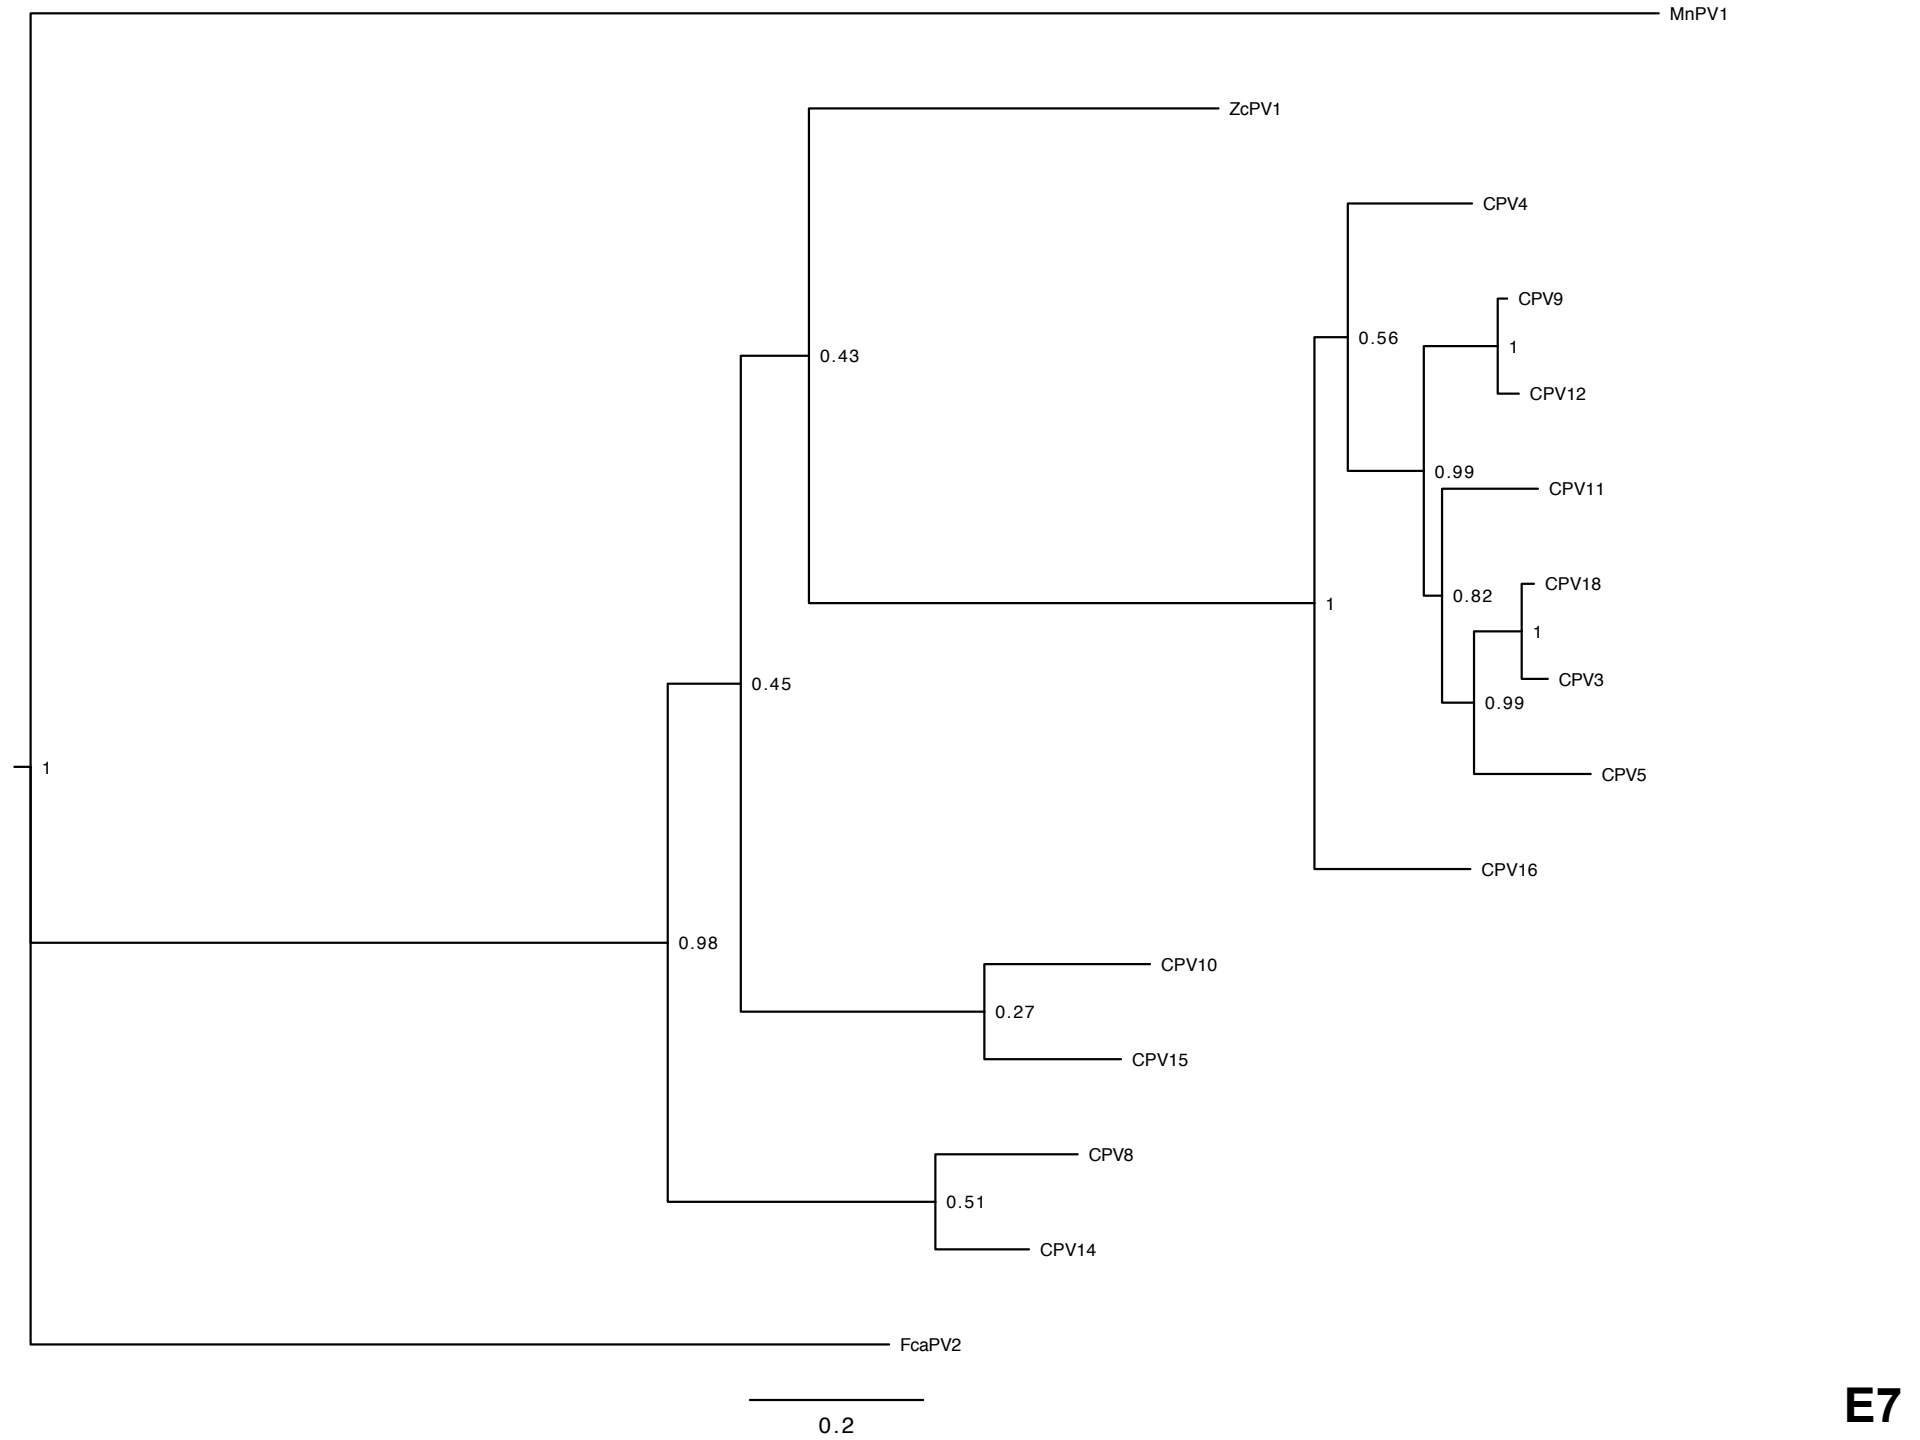

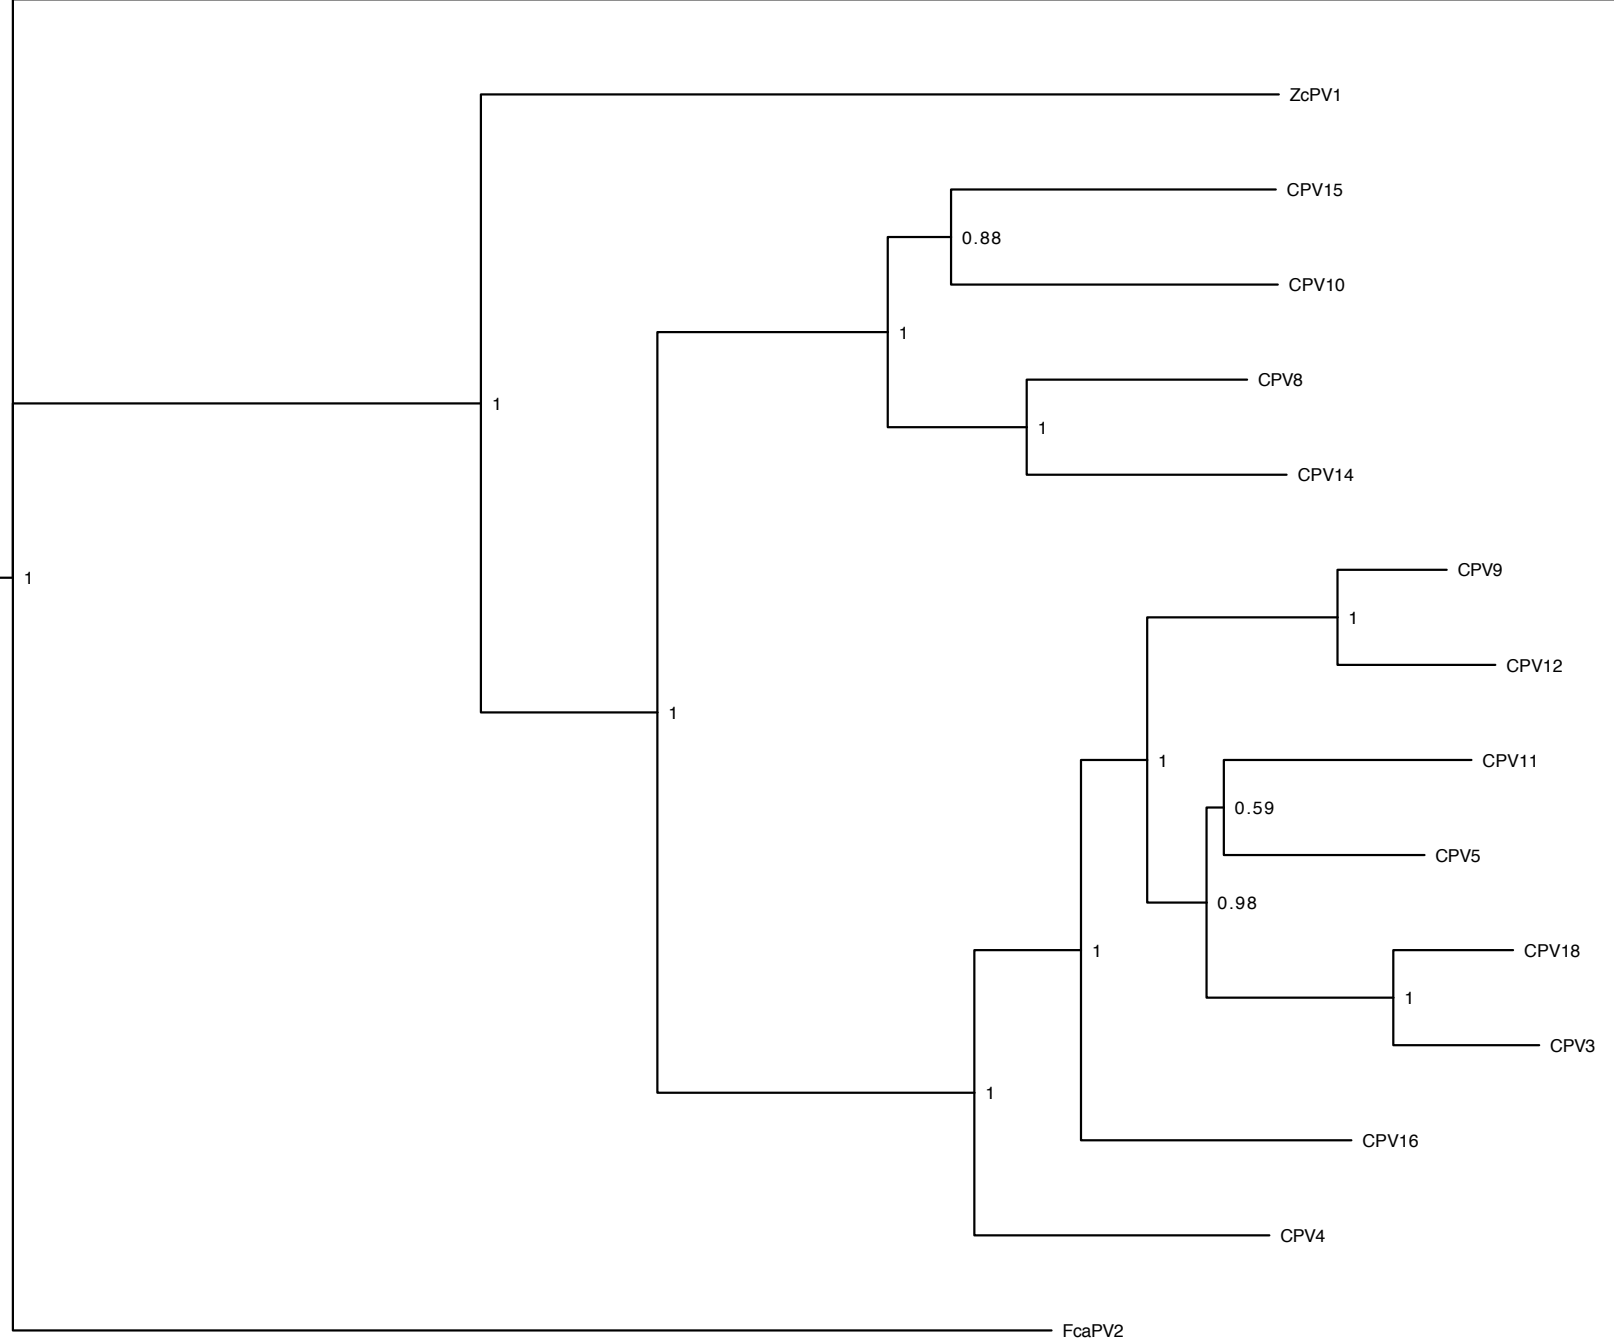

0.2

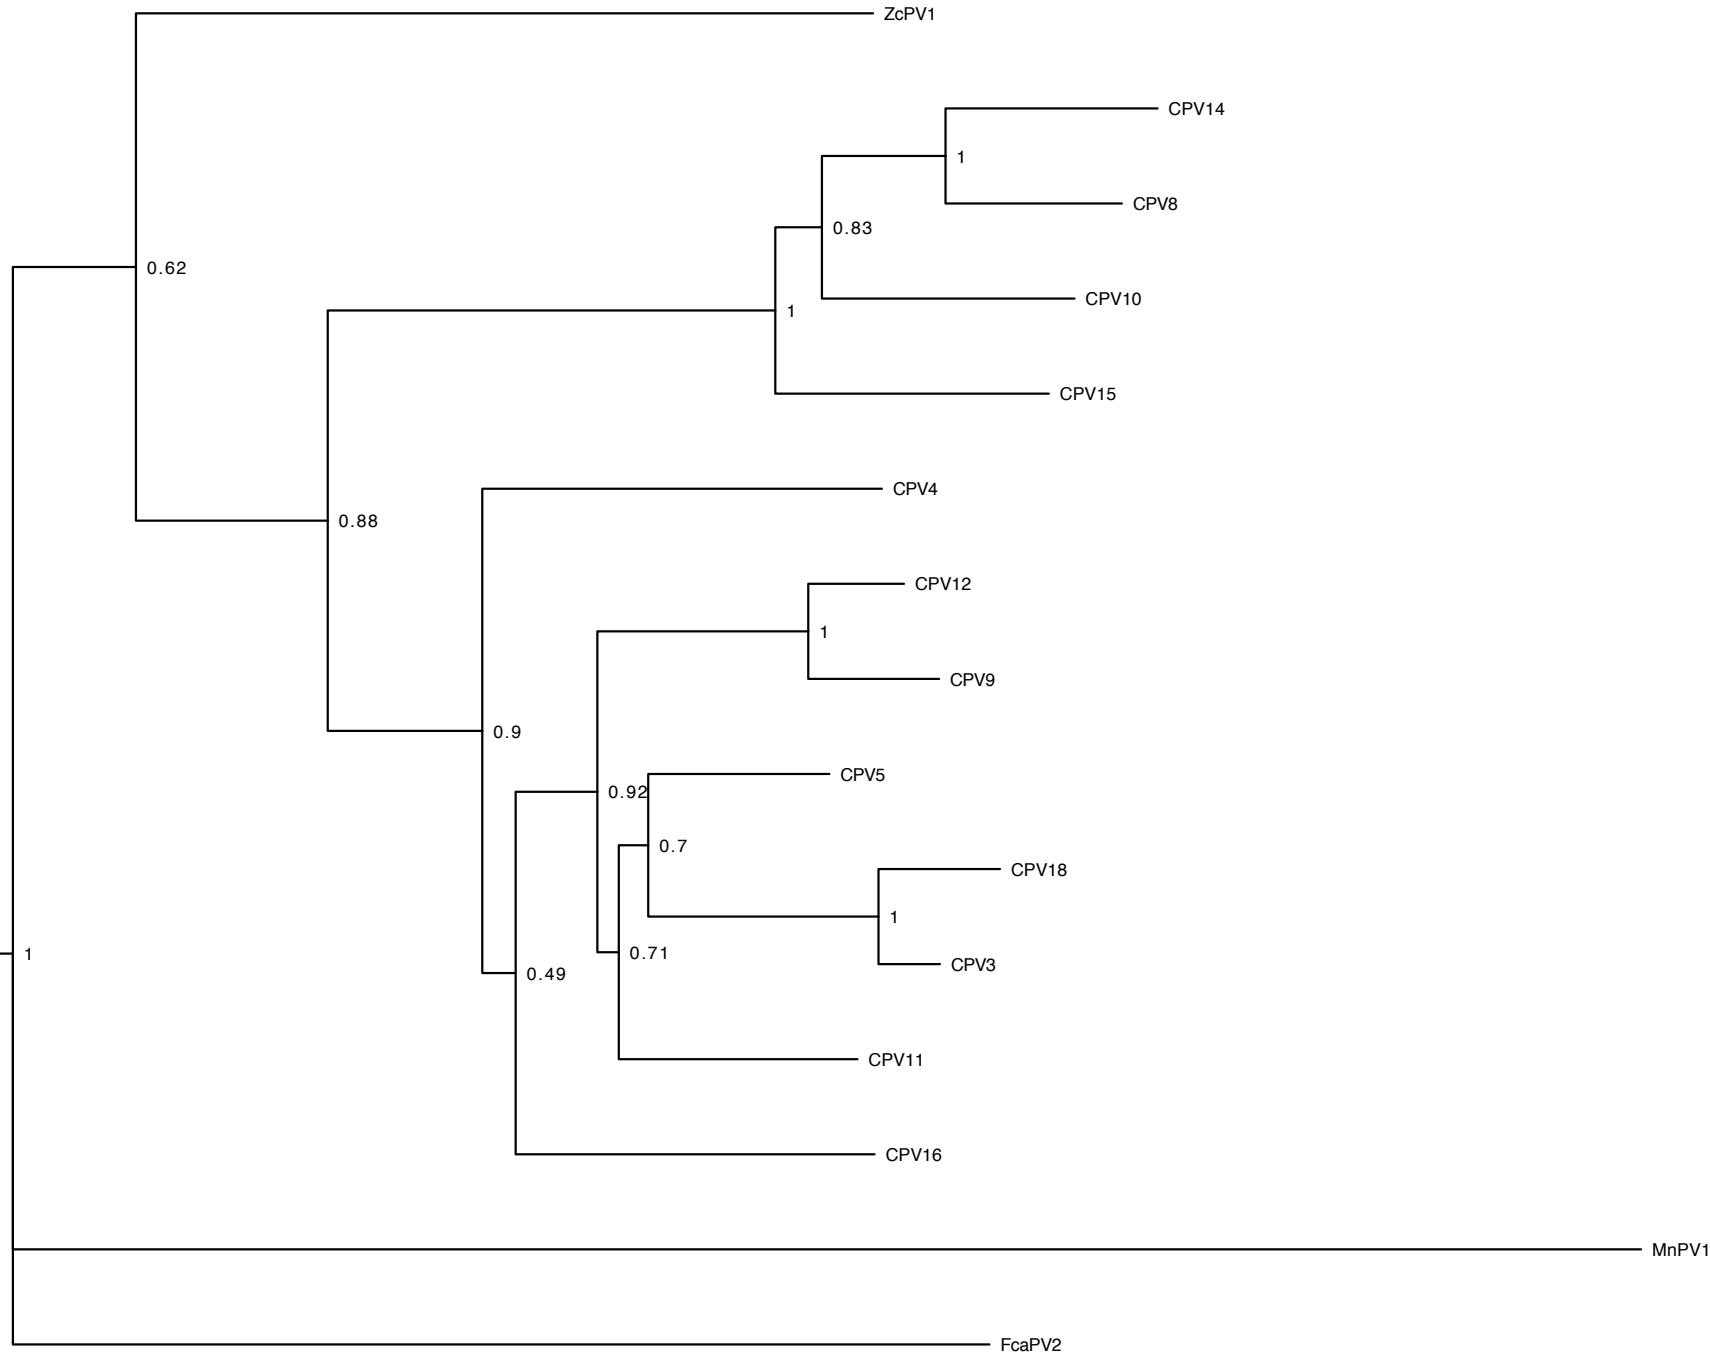

0.2

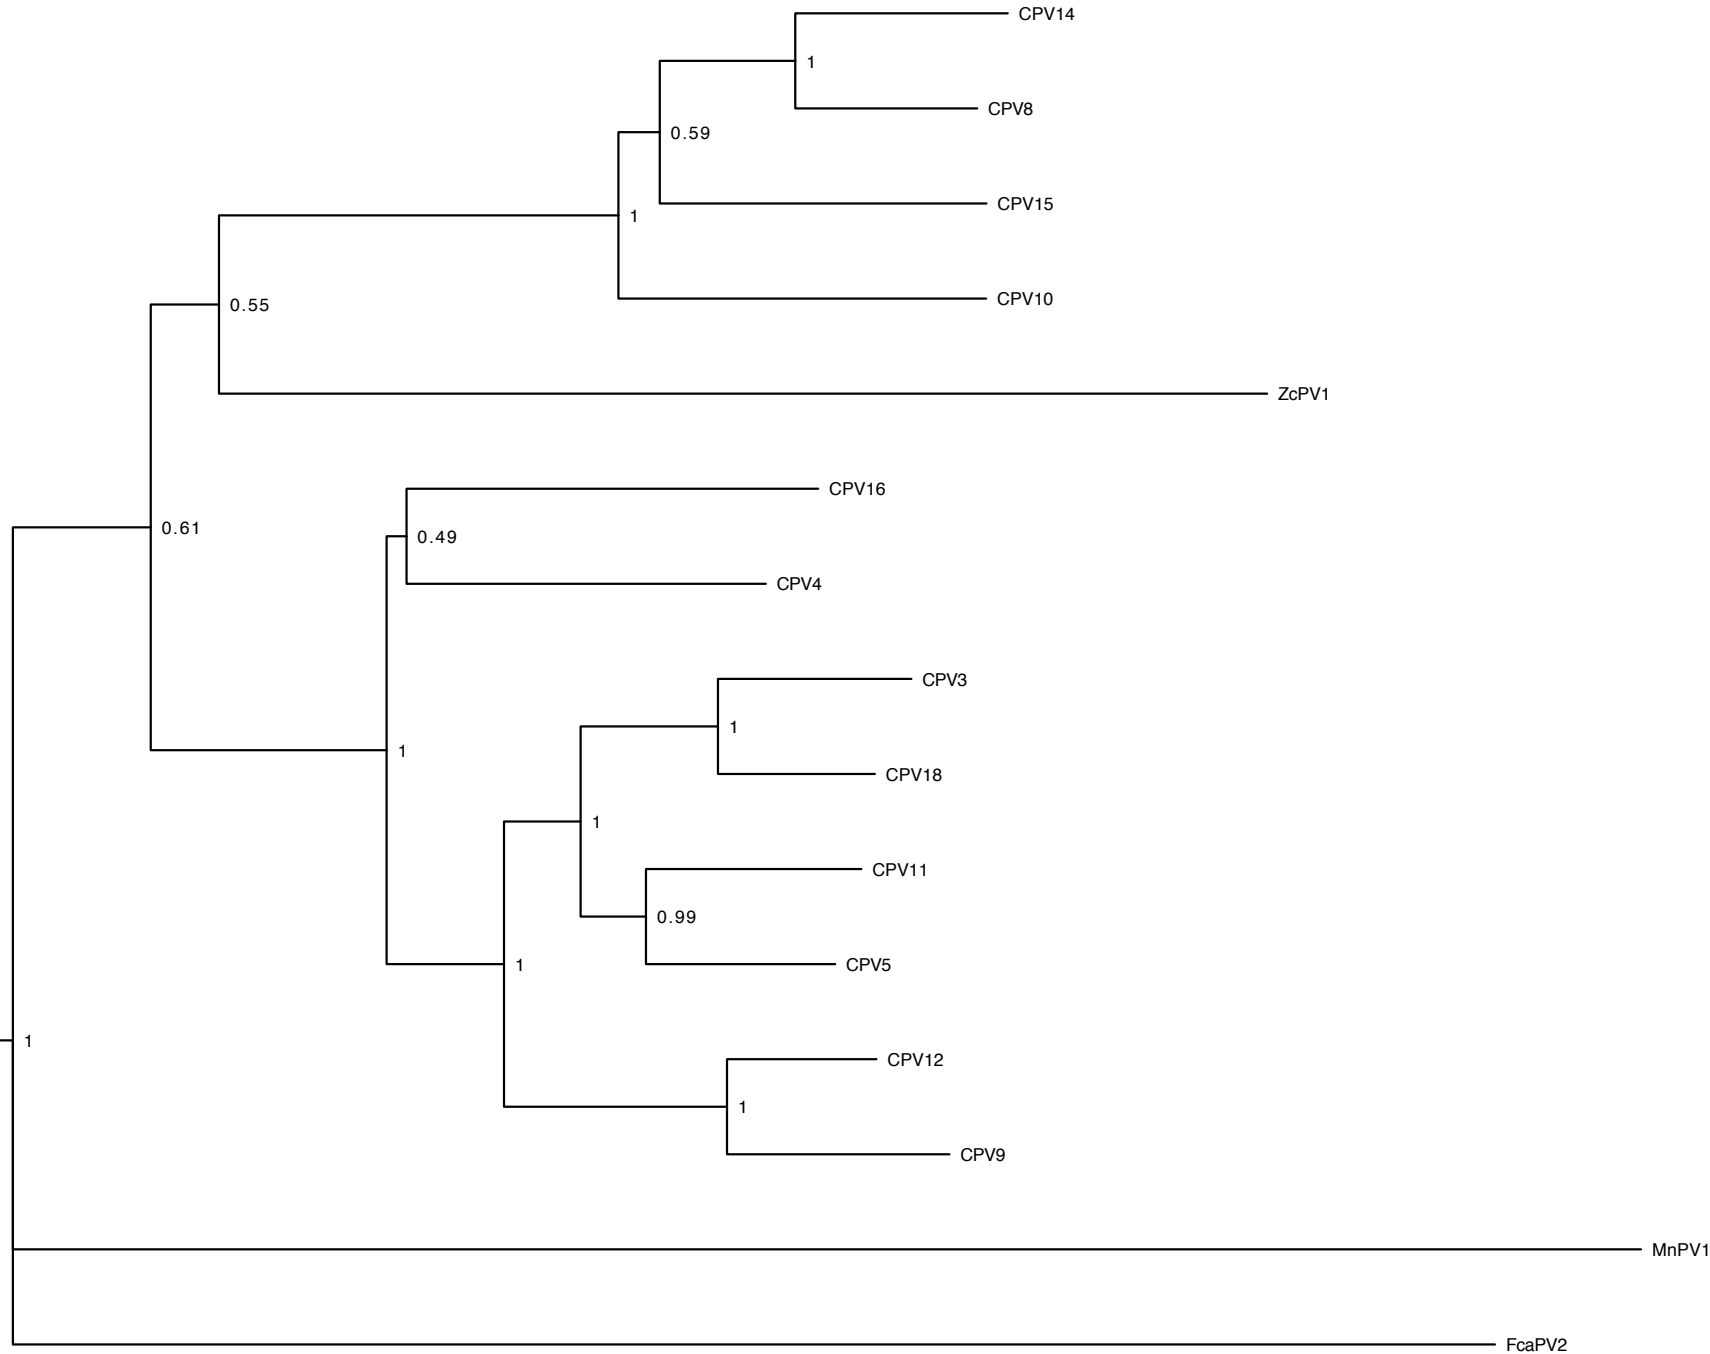

0.2

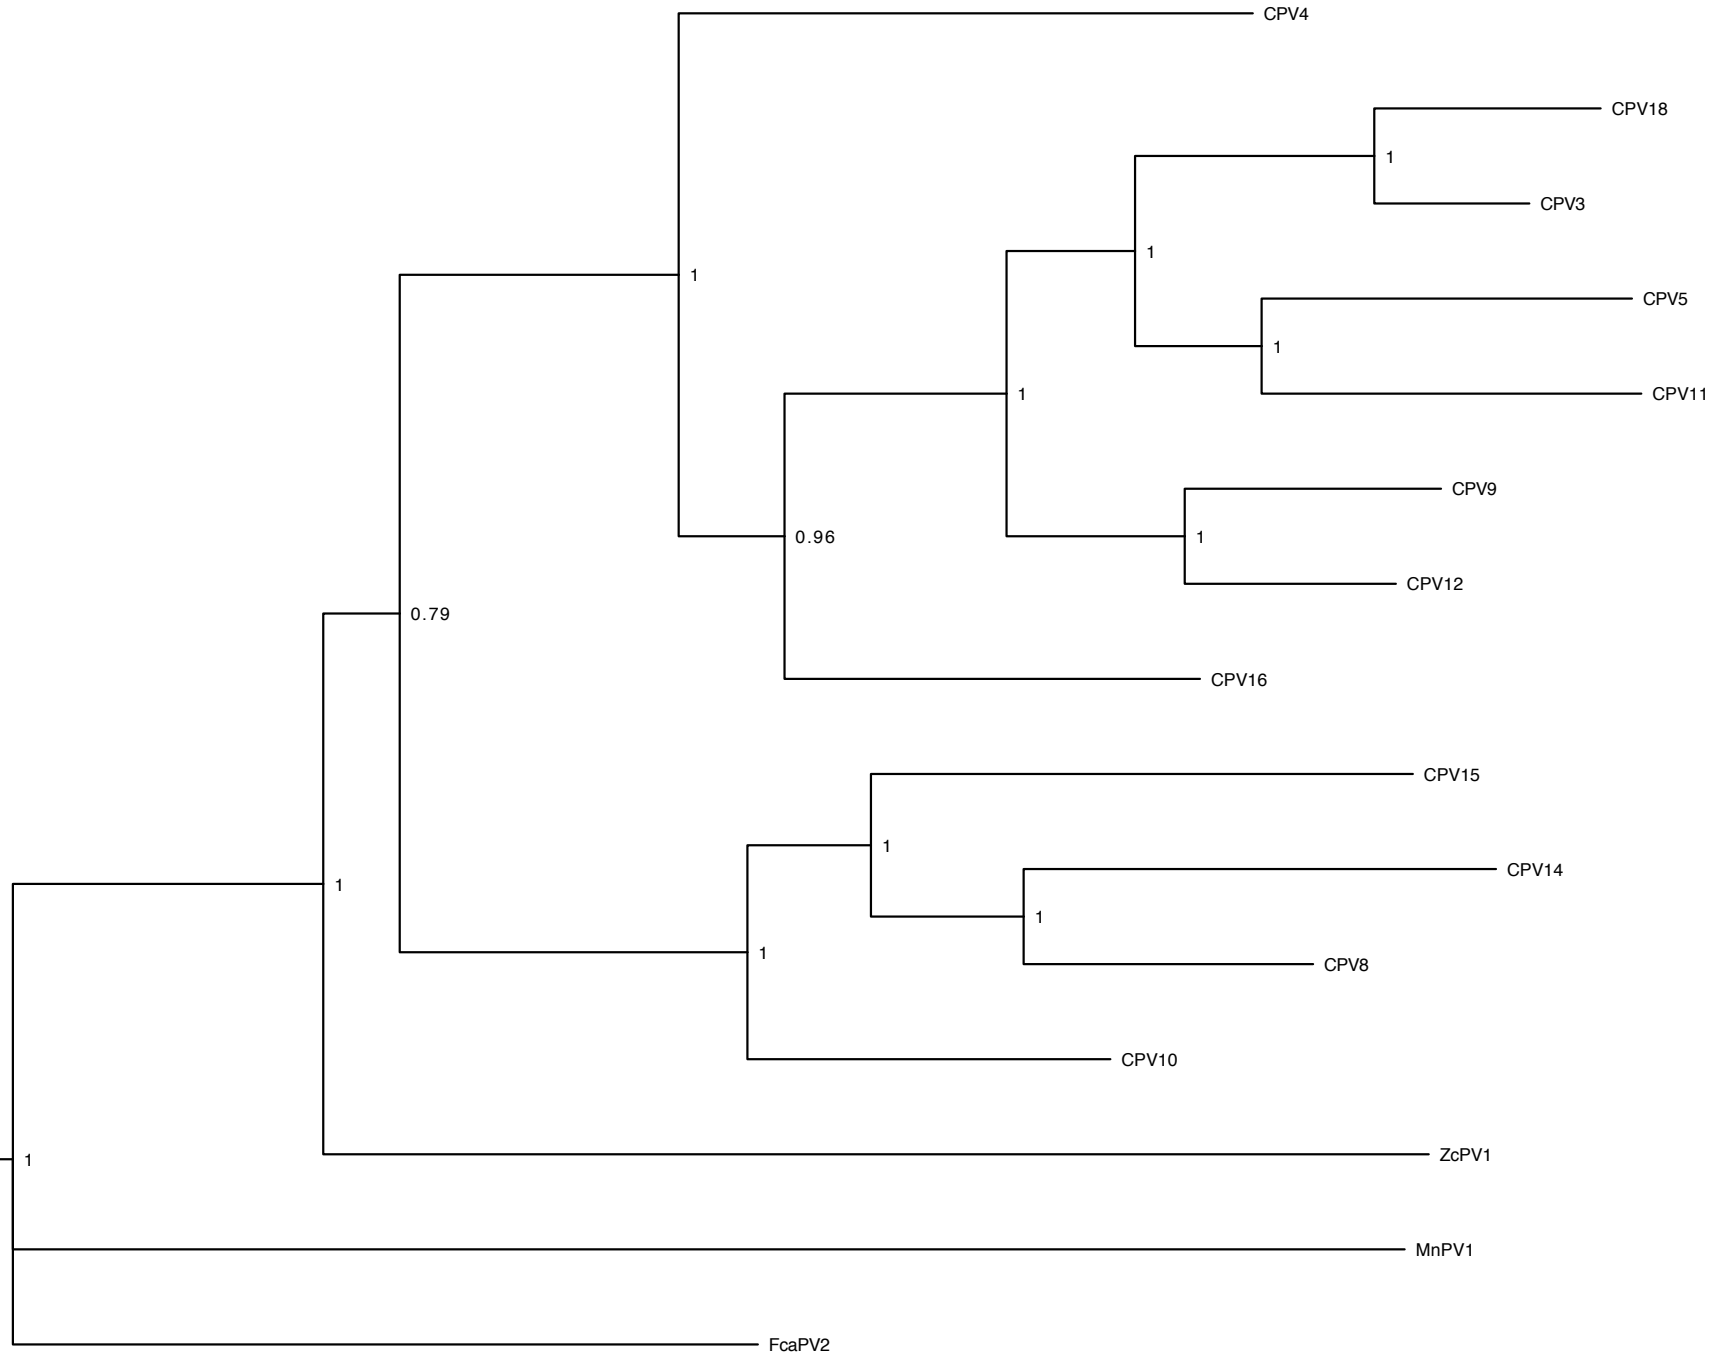

0.09

Supplement: mmc3.pdf [file mmc3.pdf]

┆0.1

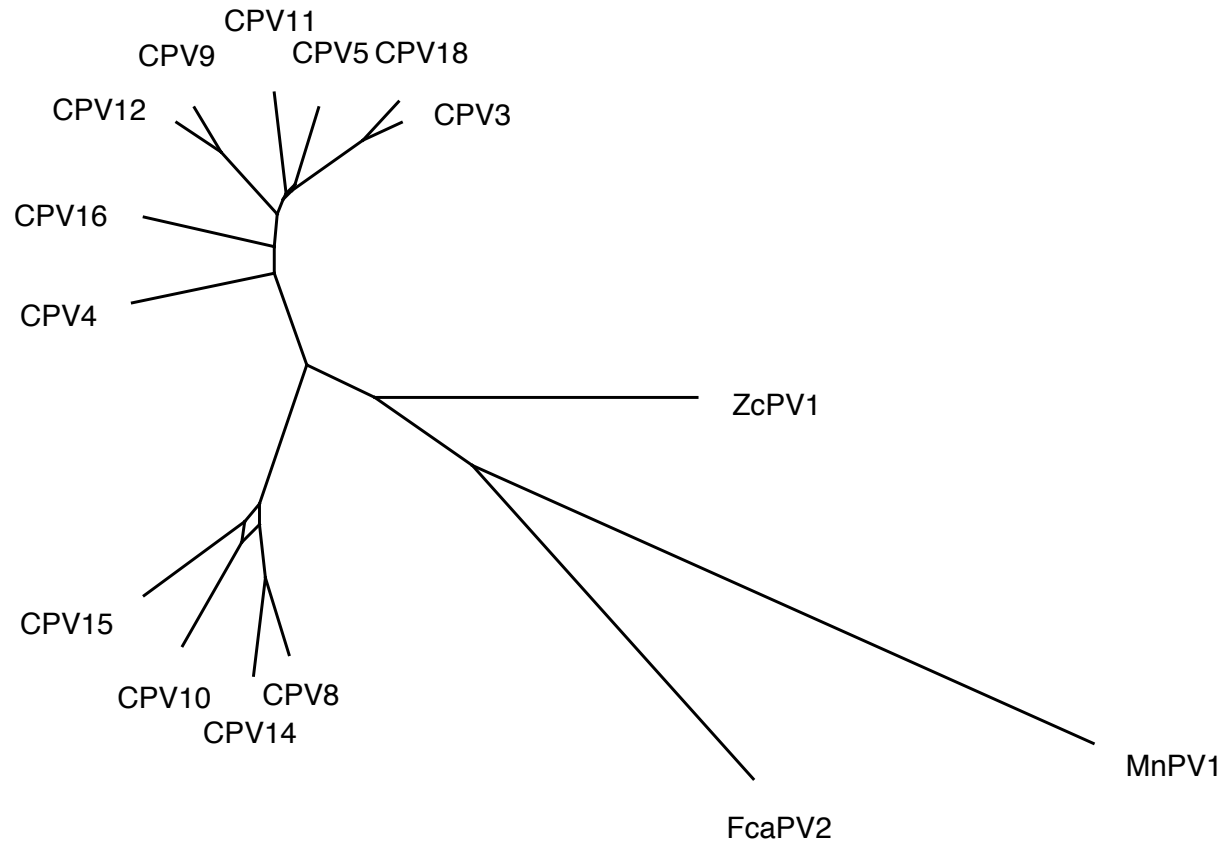

1.0

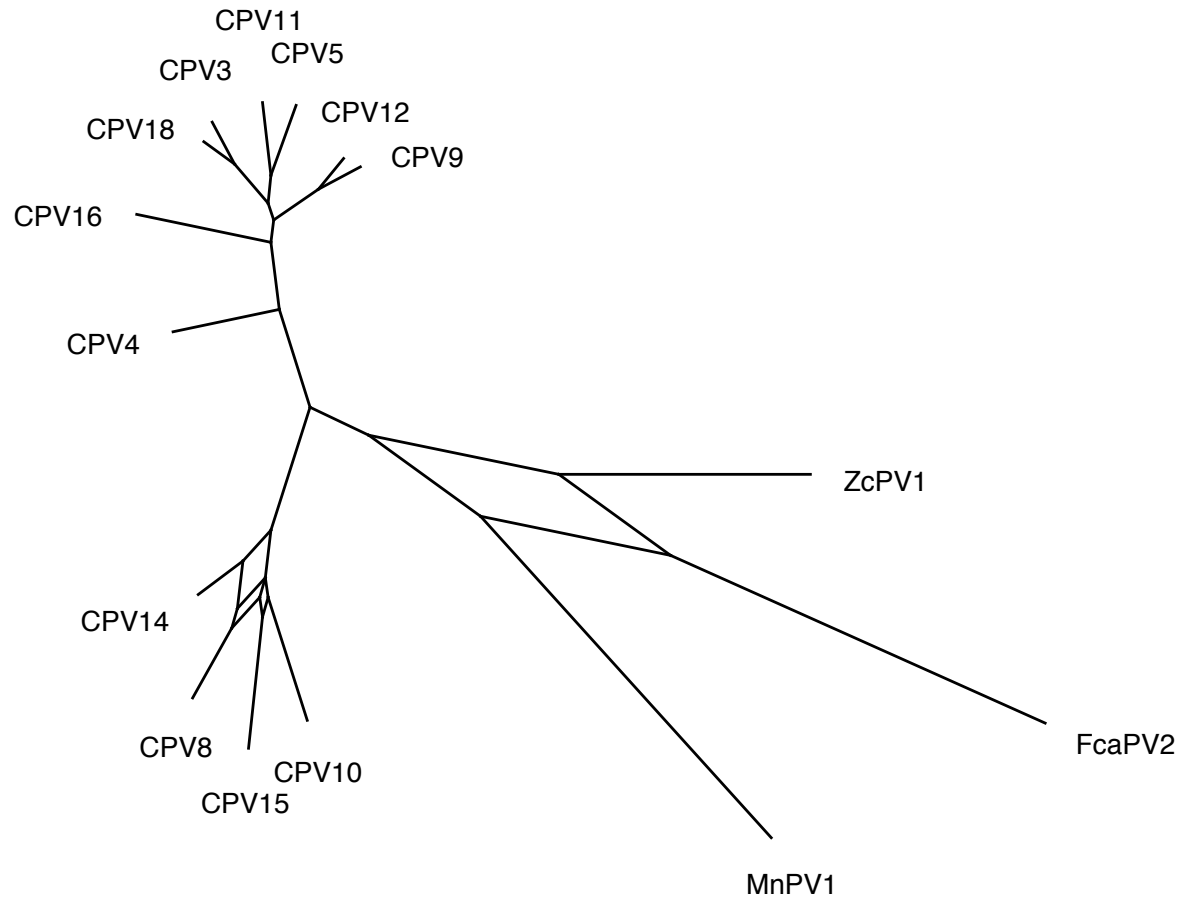

0.1

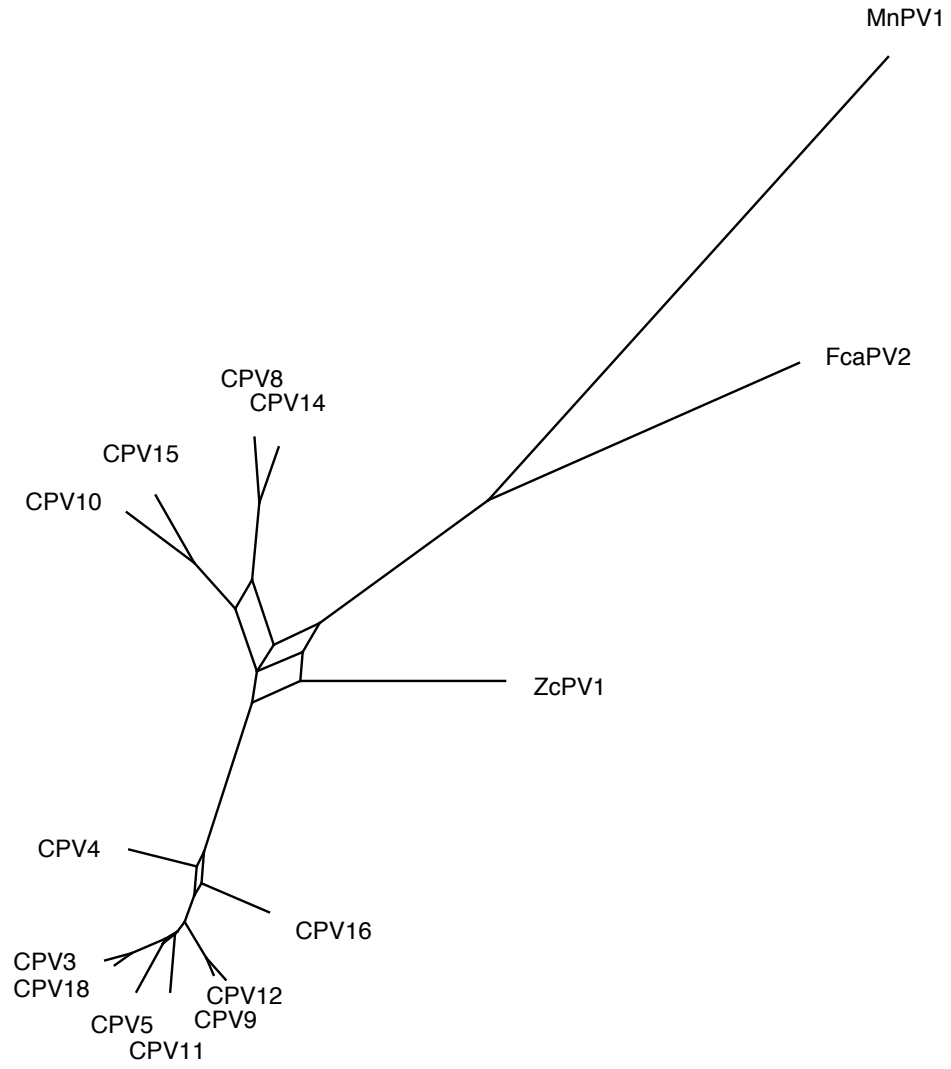

┆┆0.1

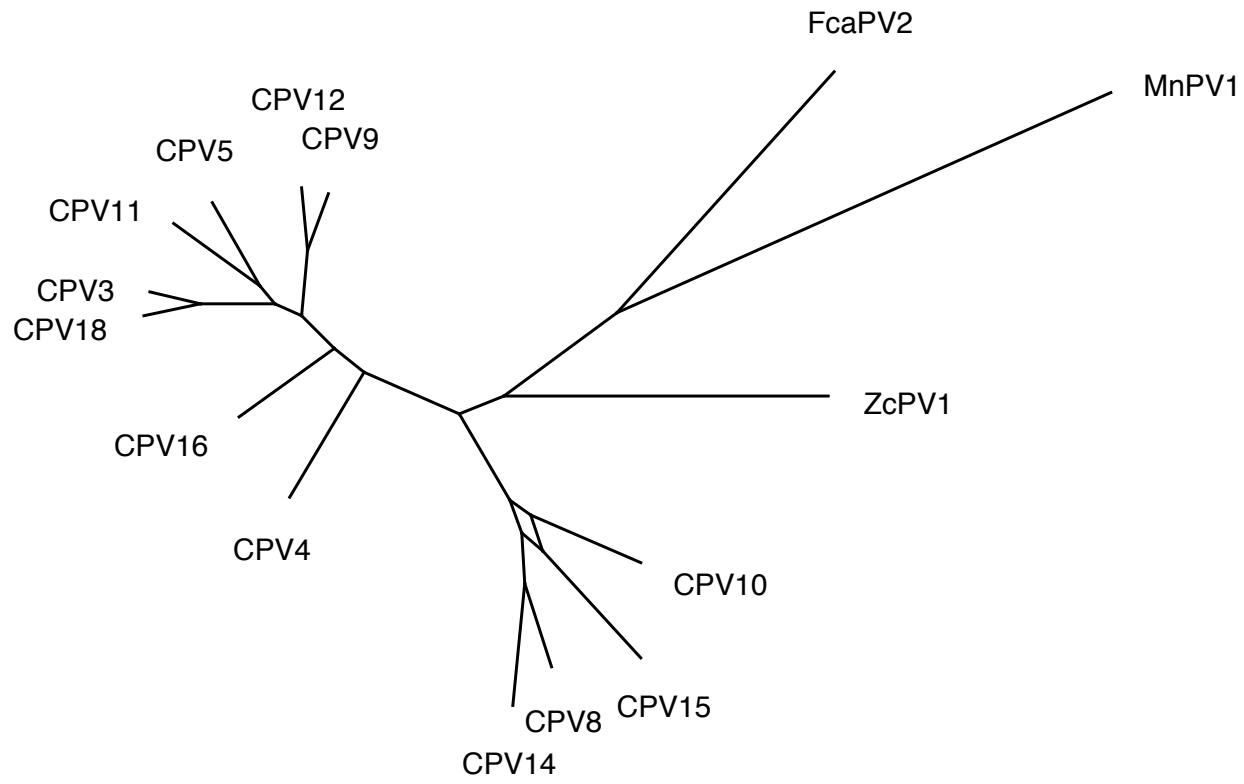

1.0

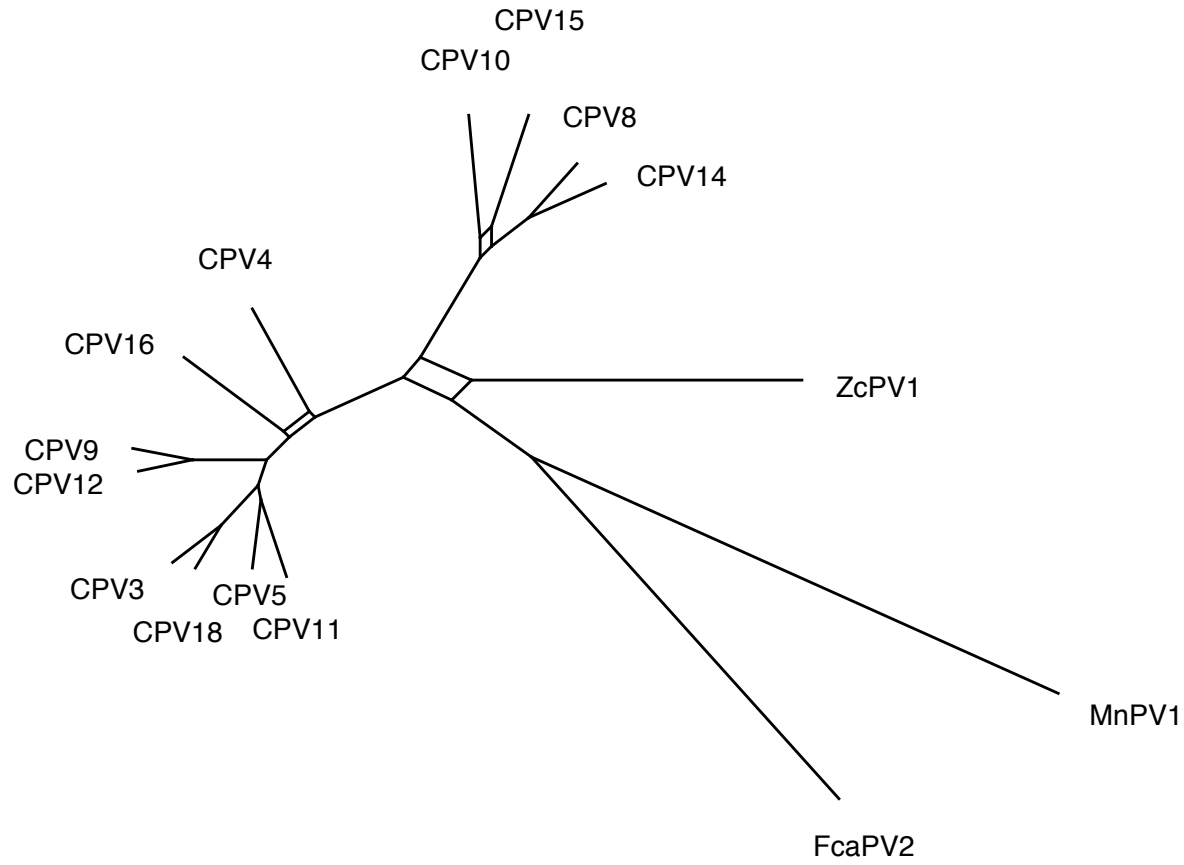

1.0

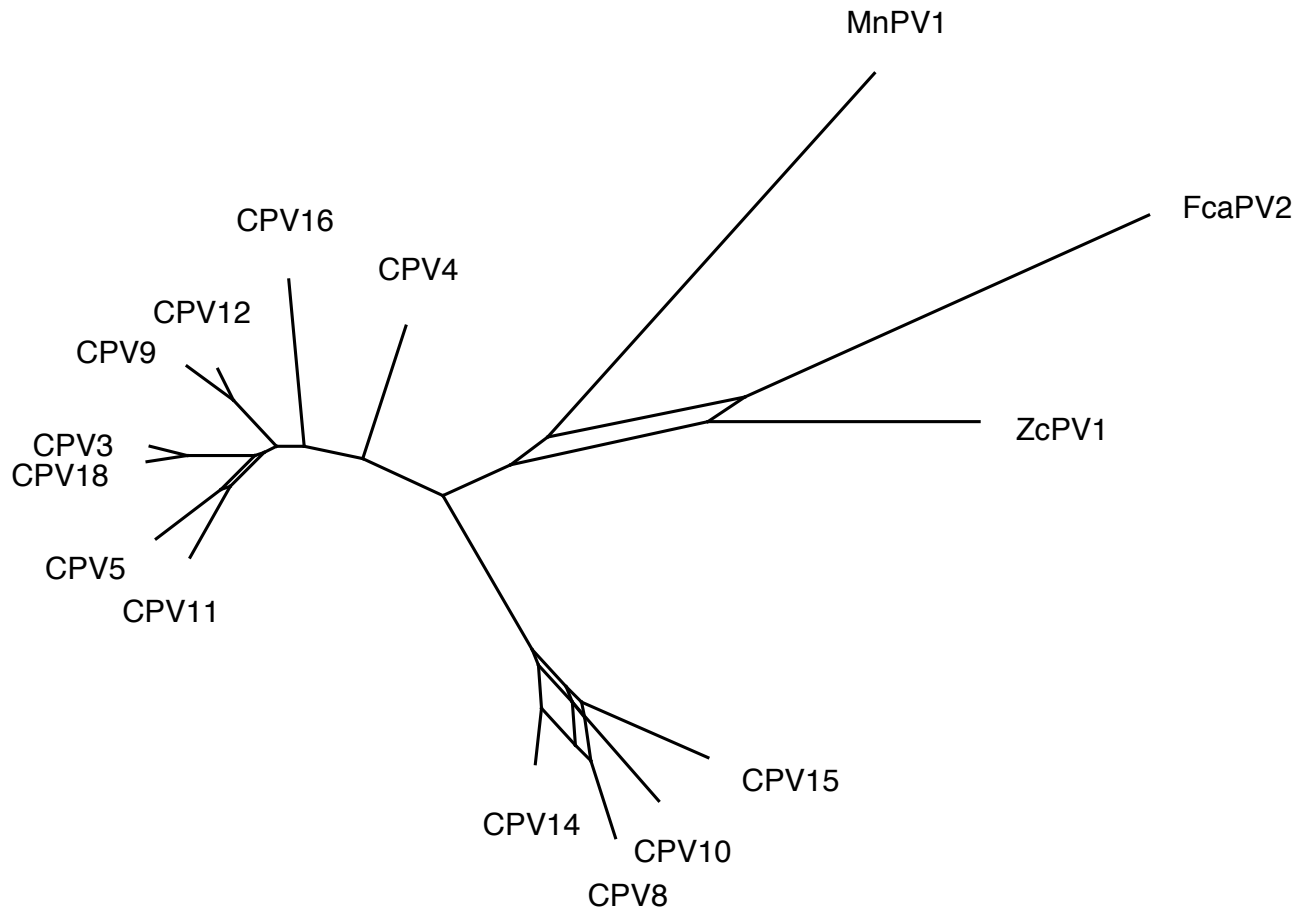

0.1

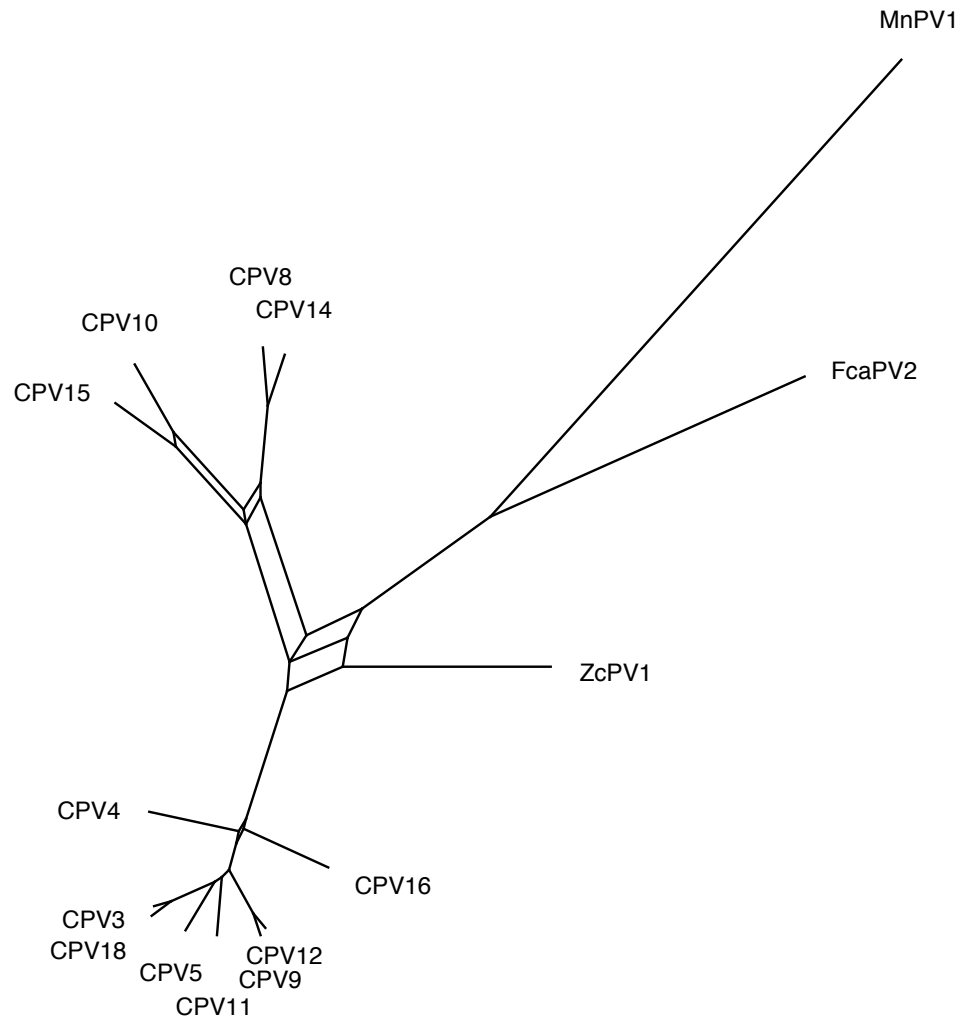

0.1

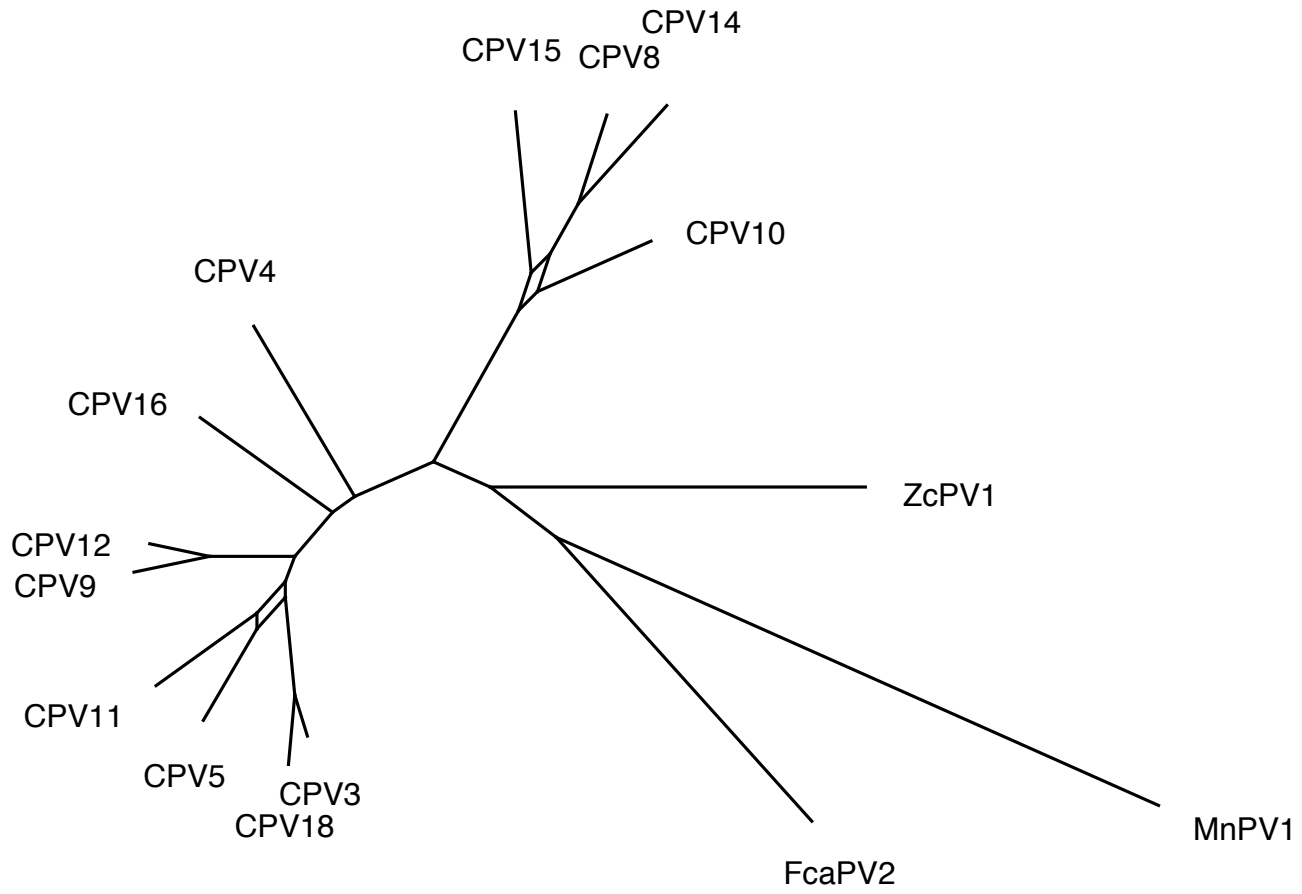



1.0

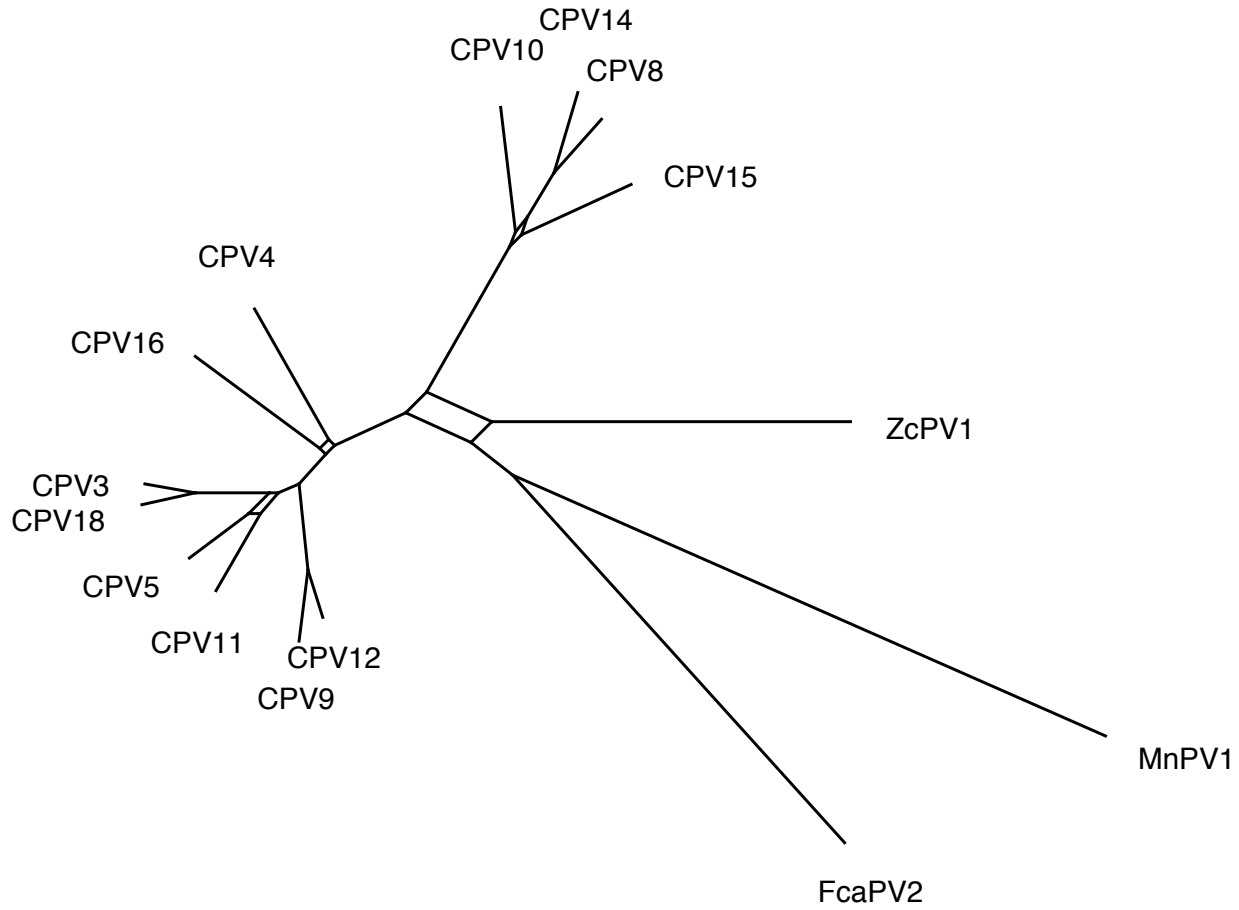

1.0

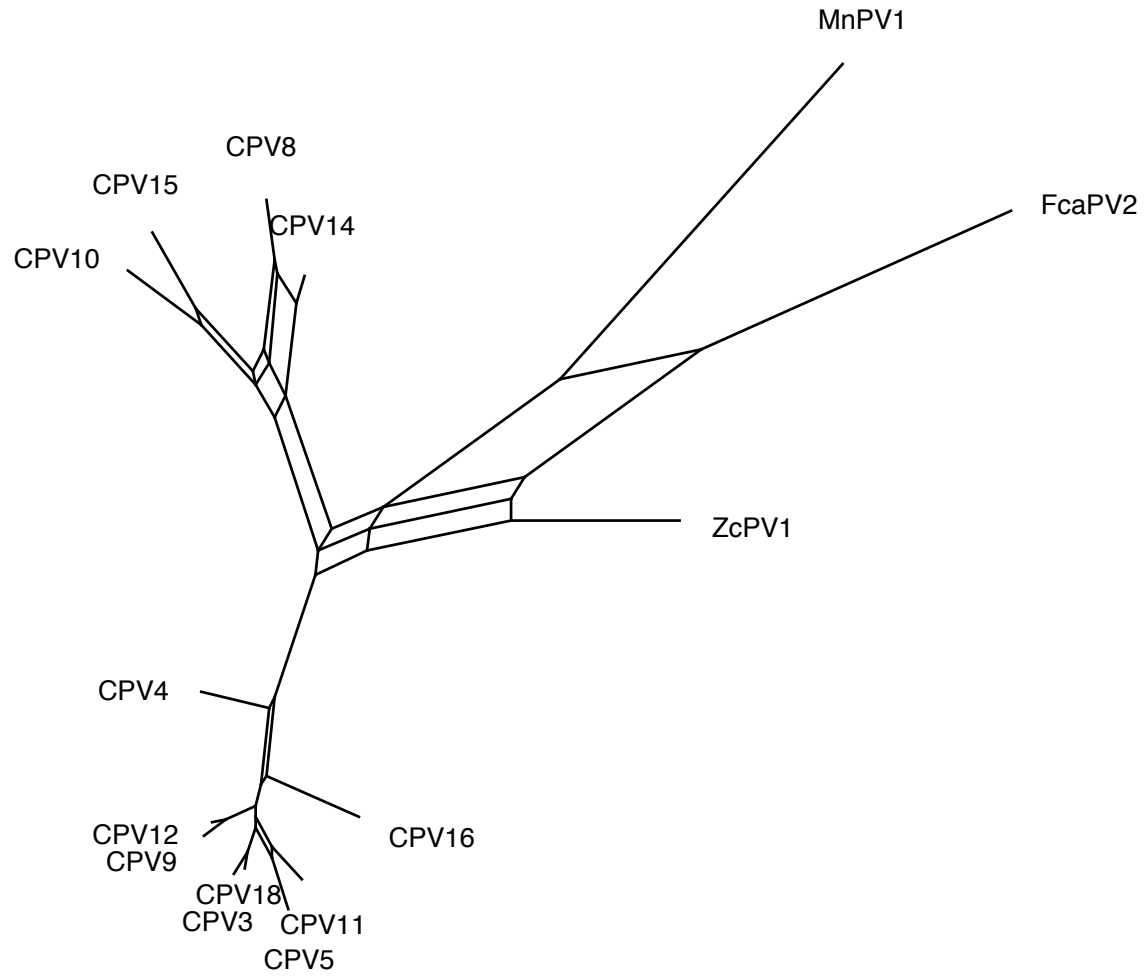

0.1

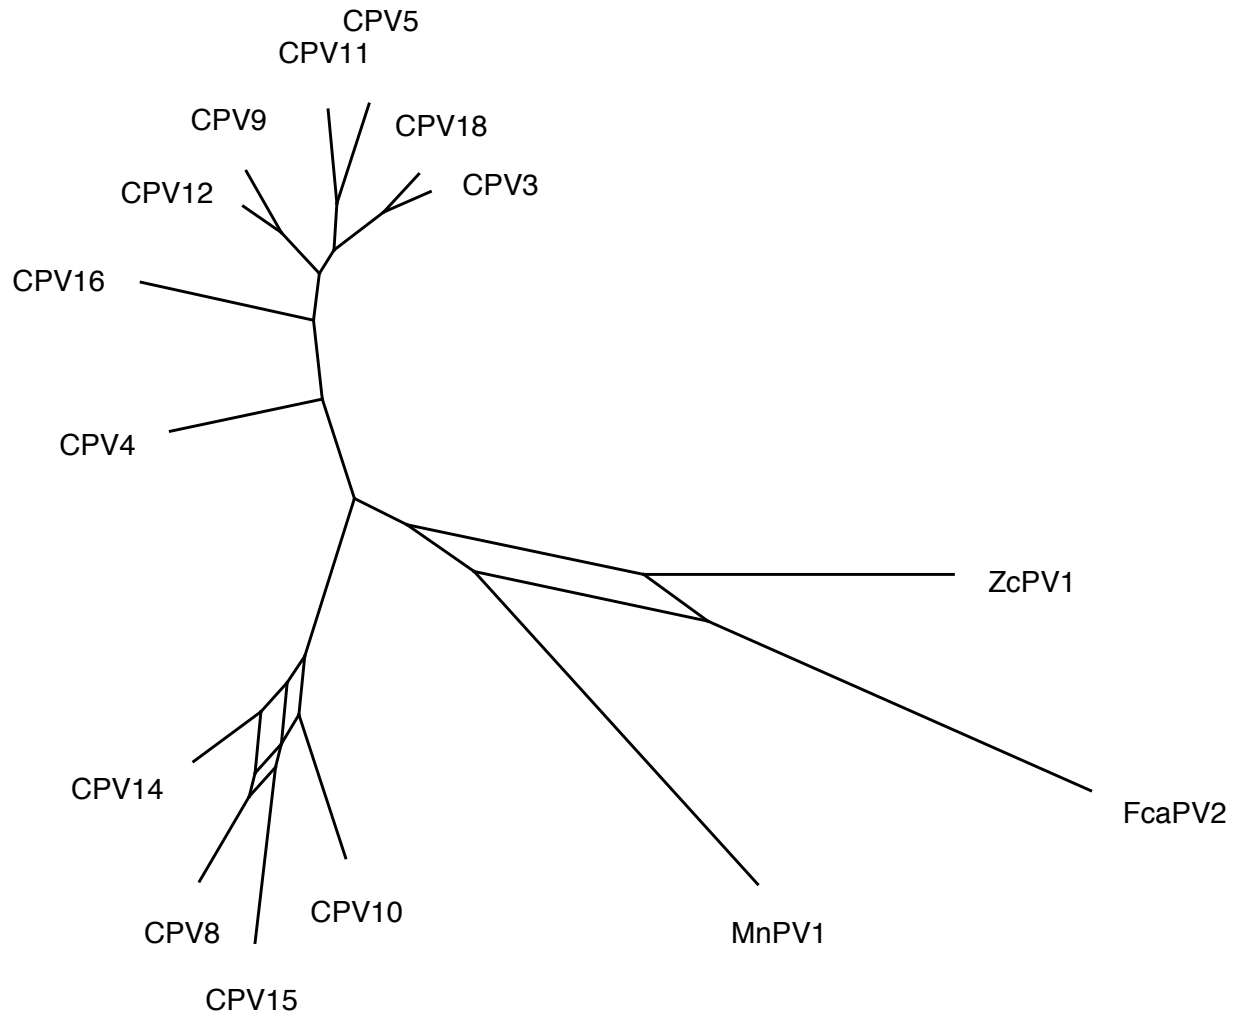

1.0

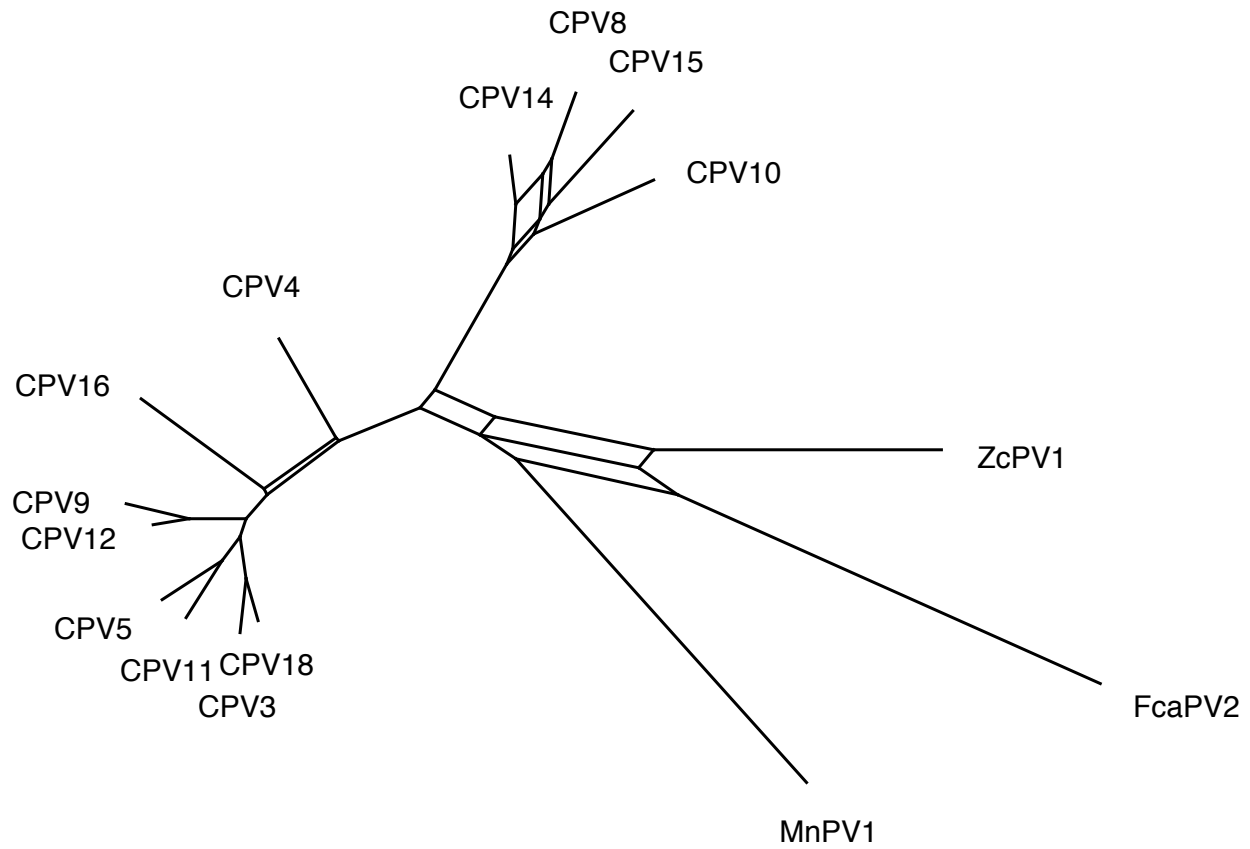

0.1

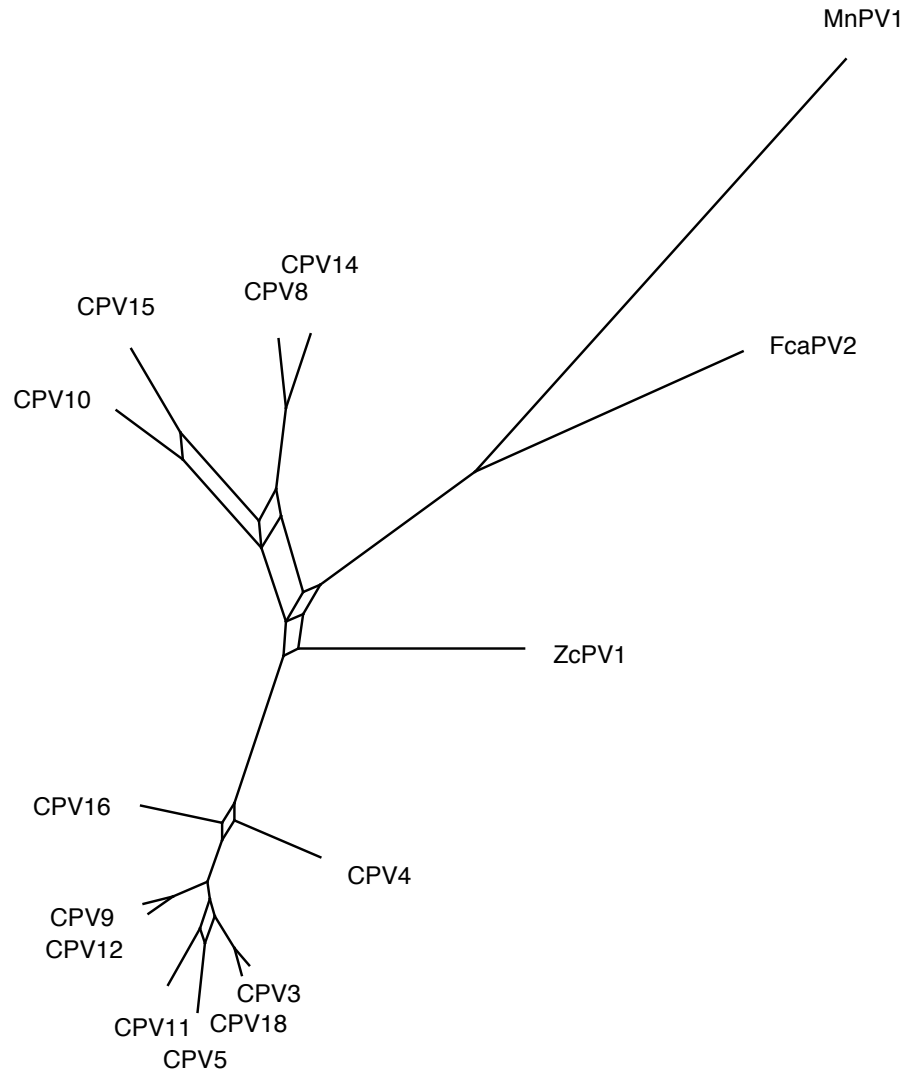

1.0

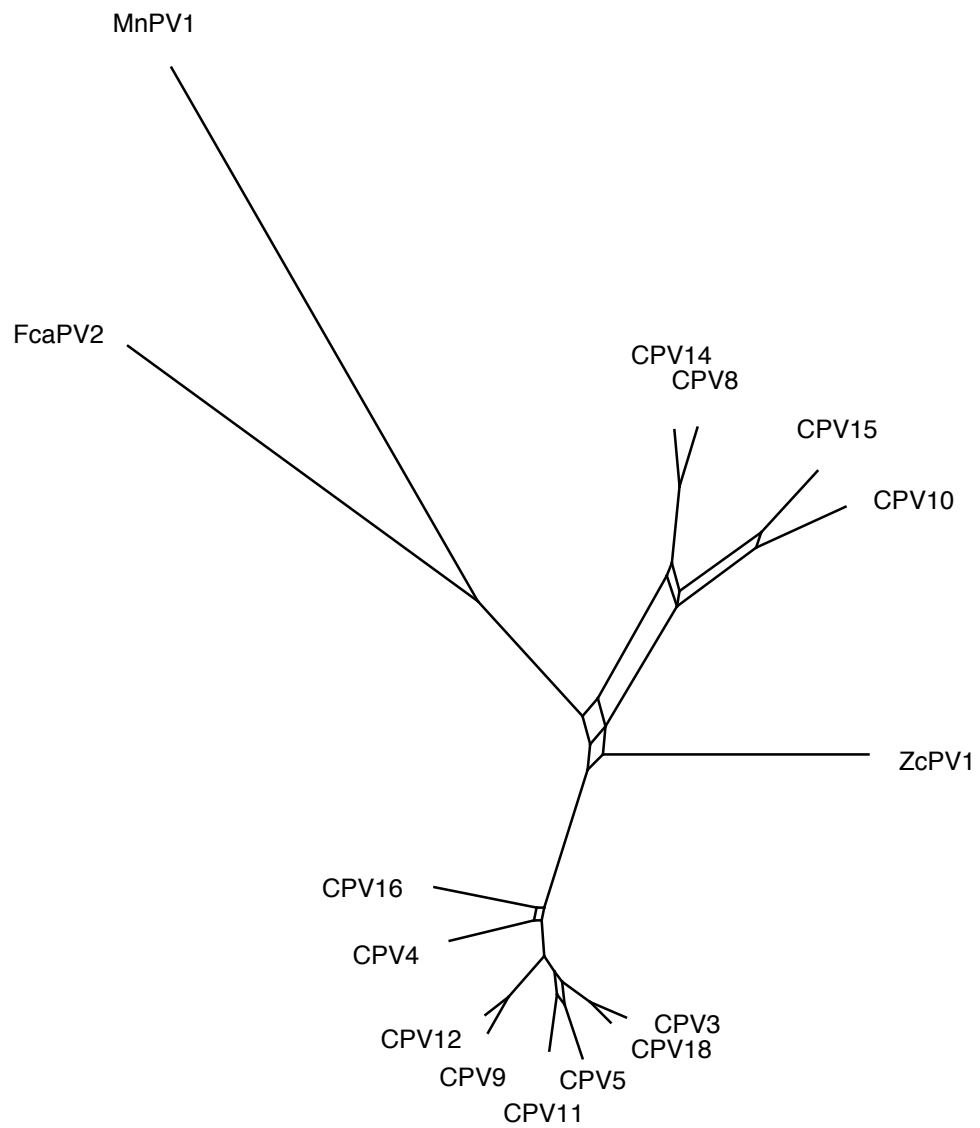

┆ 0.1

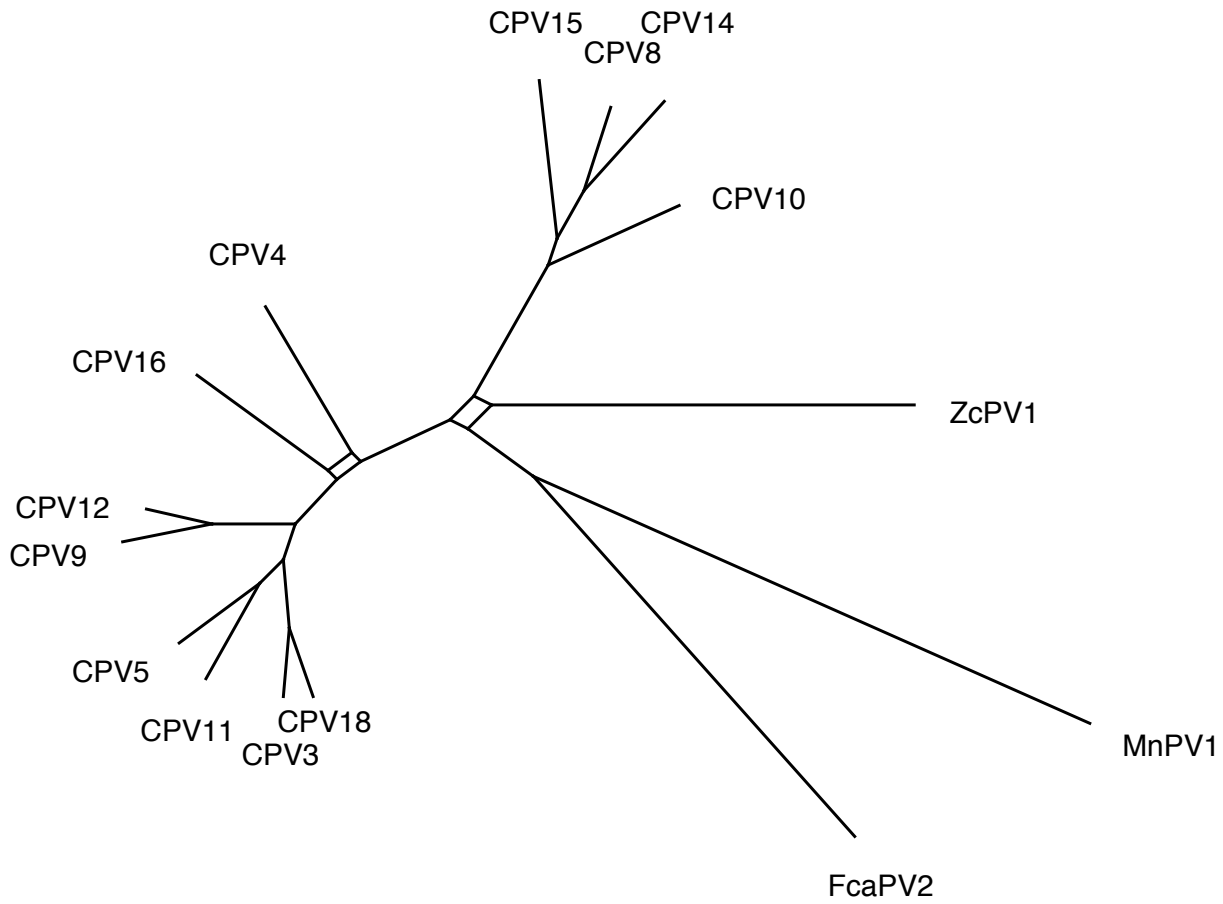

Supplement: mmc4.pdf [file mmc4.pdf]
